# Supplementary material
Source: bioRxiv or medRxiv preprint supplement (https://www.medrxiv.org/highwire/filestream/95267/field_highwire_adjunct_files/0/2020.08.31.20184994-1.pdf)

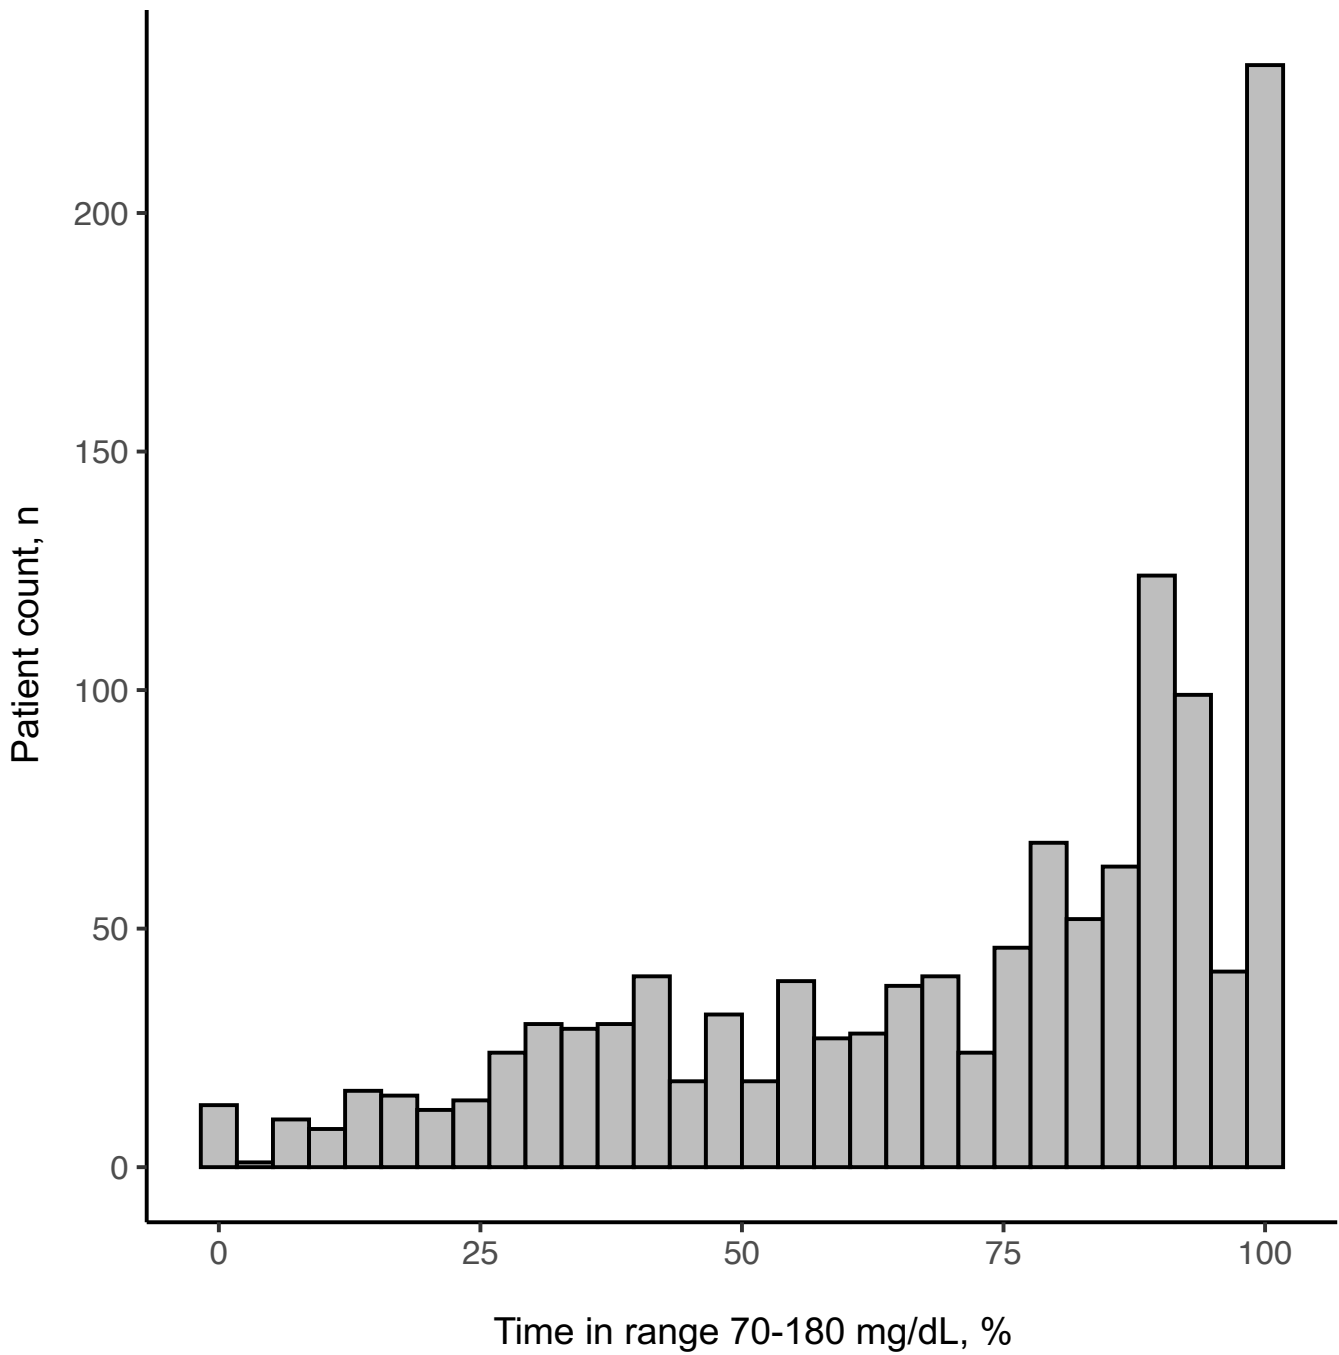

Supplement: Supplementary file [file 2020.08.31.20184994-1.pdf]
